# Supplementary material
Source: PubMed Central journal article supplement (PMC3677303)
Supplement: mt201360x1.pdf [file mt201360x1.pdf]

**Figure S1**

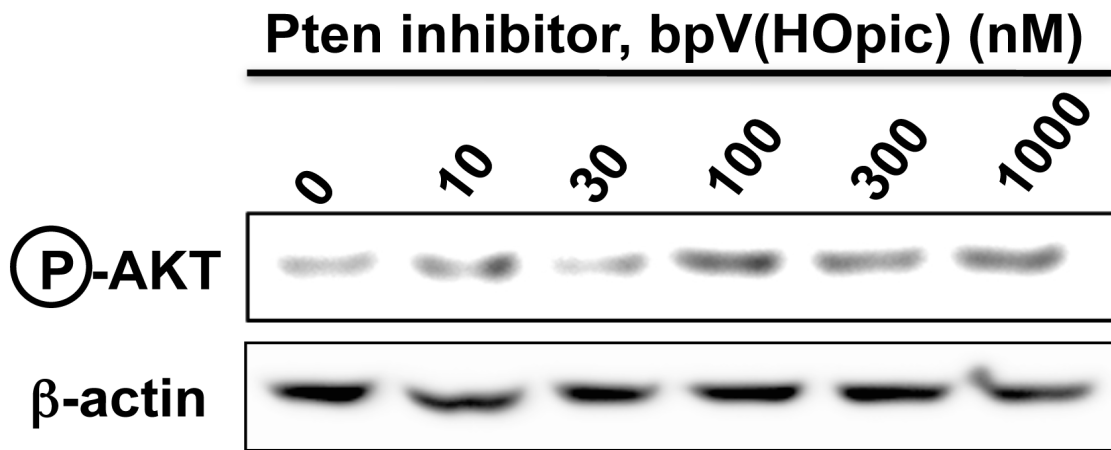

Figure S2

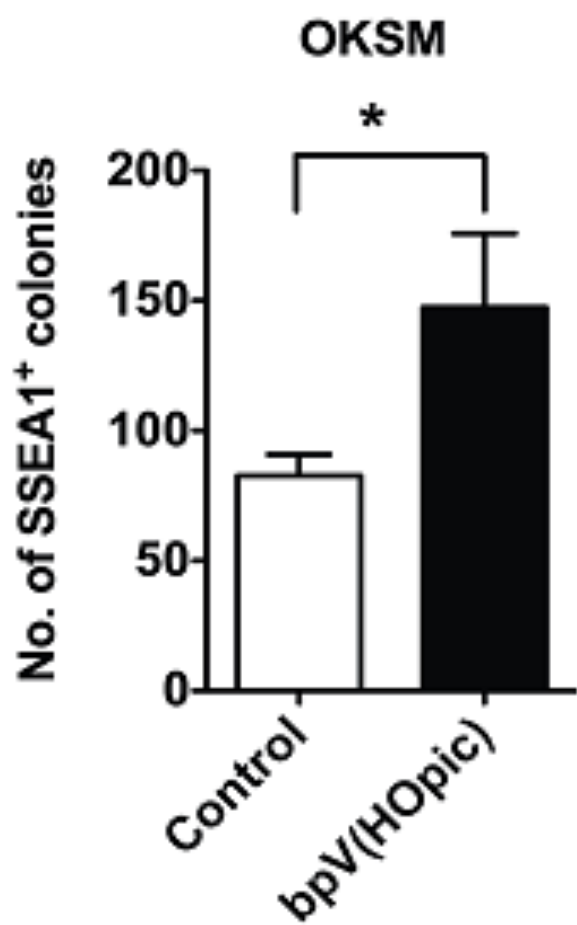

Figure S3

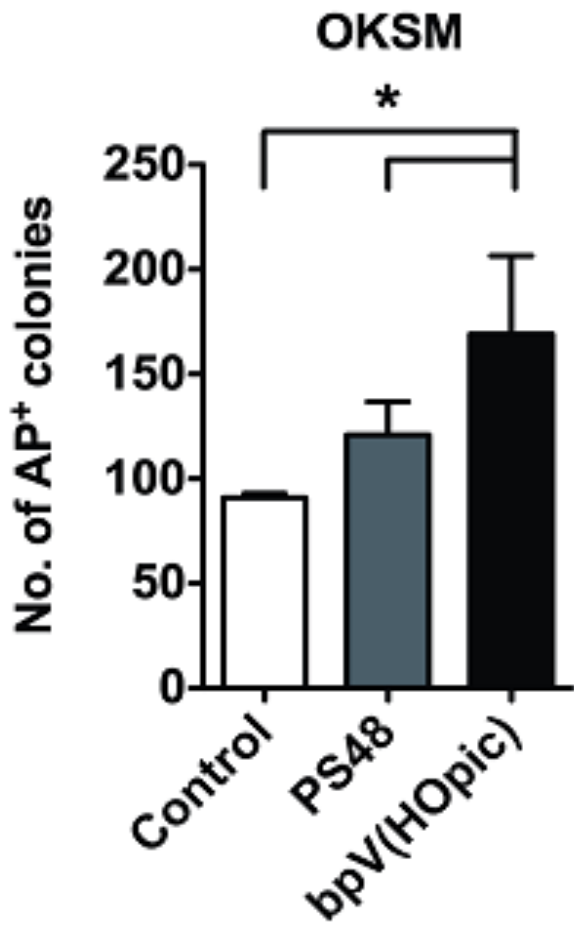

Figure S4

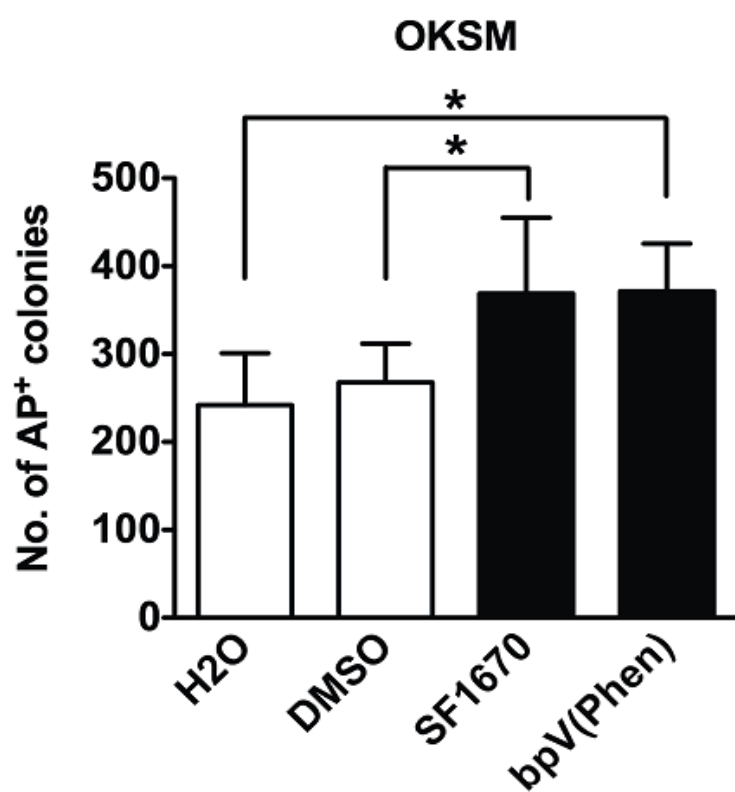

Figure S5

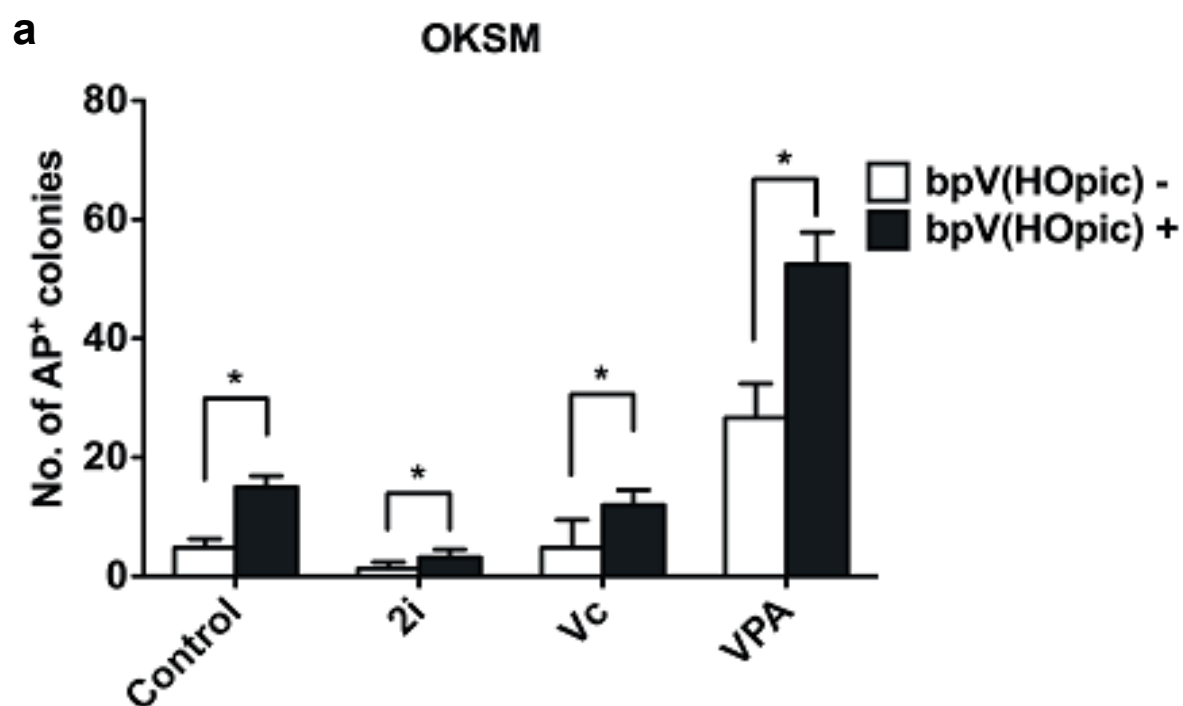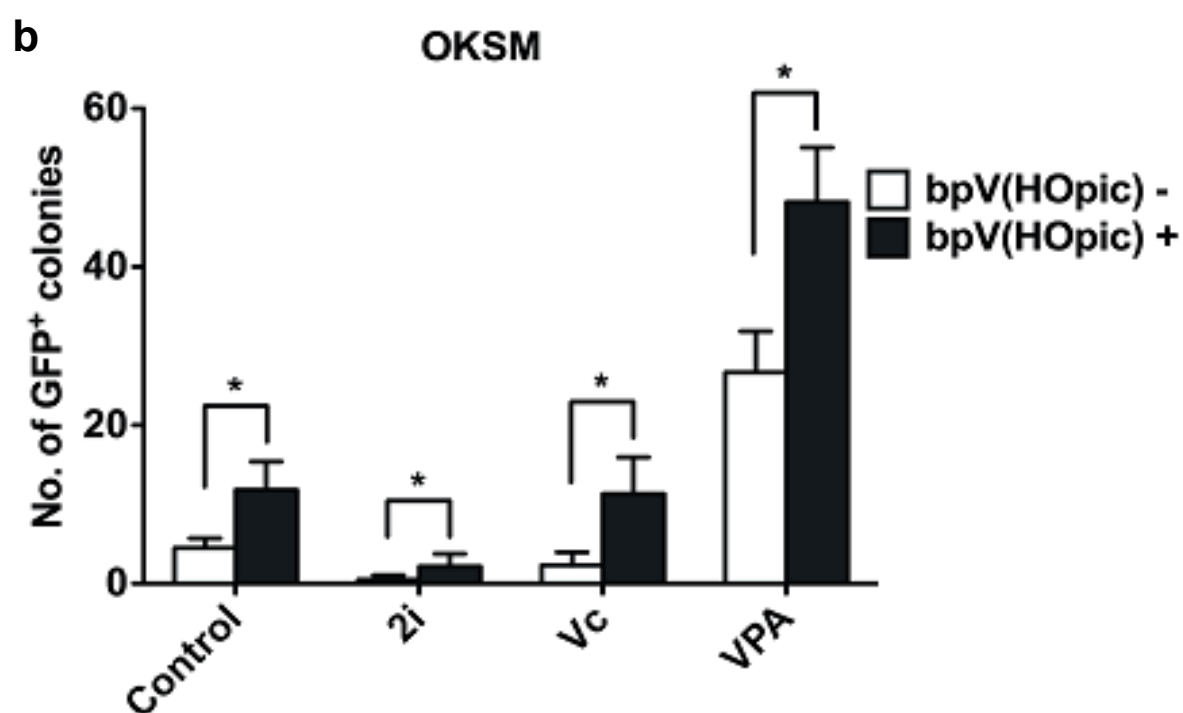

Figure S6

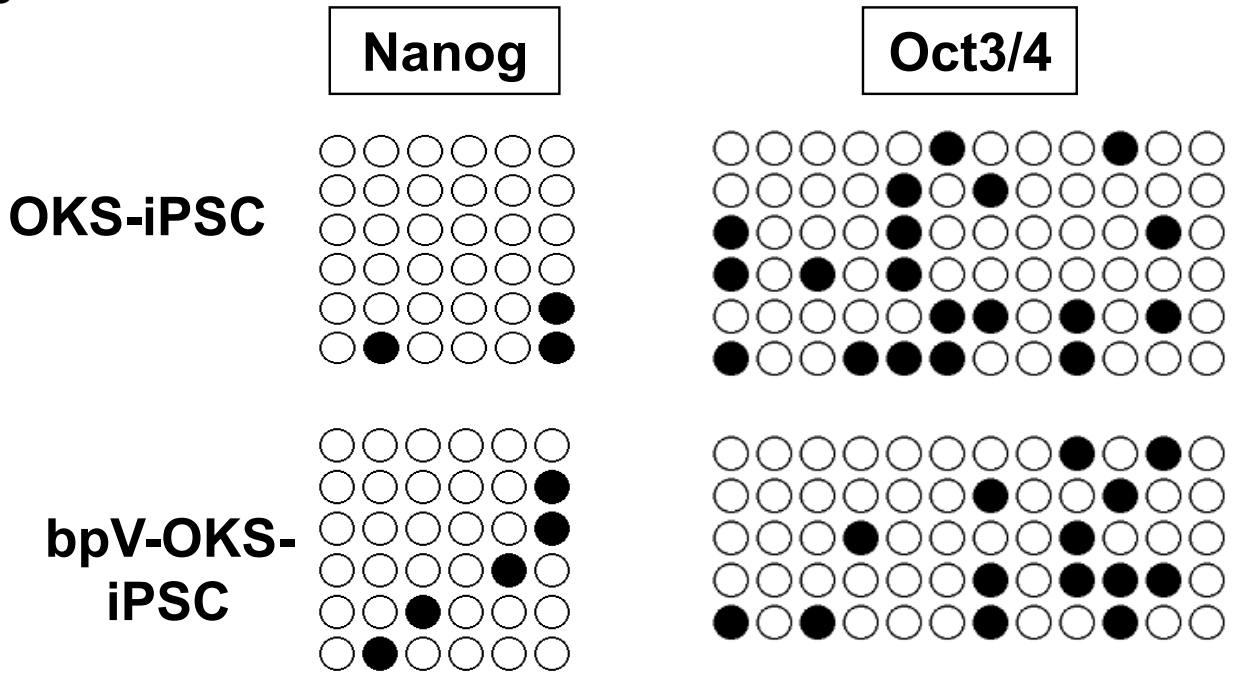

**Figure S7**

**bpV-iPSC**

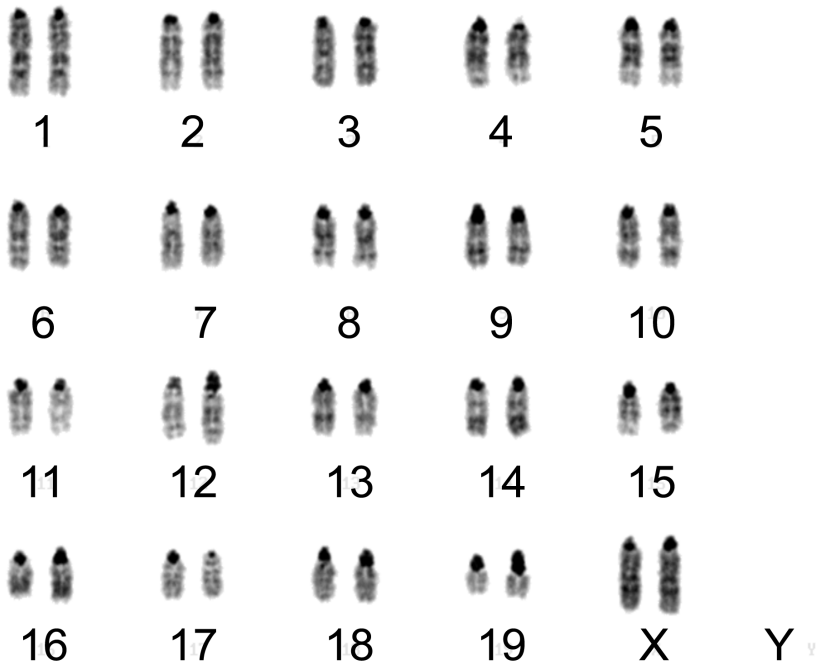

**Figure S8**

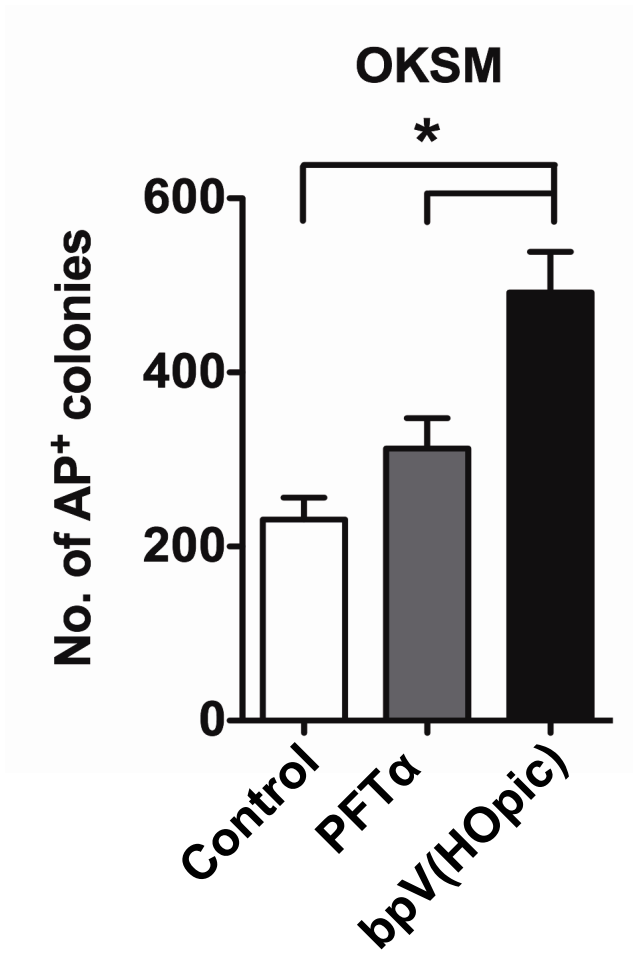



**Figure S9**

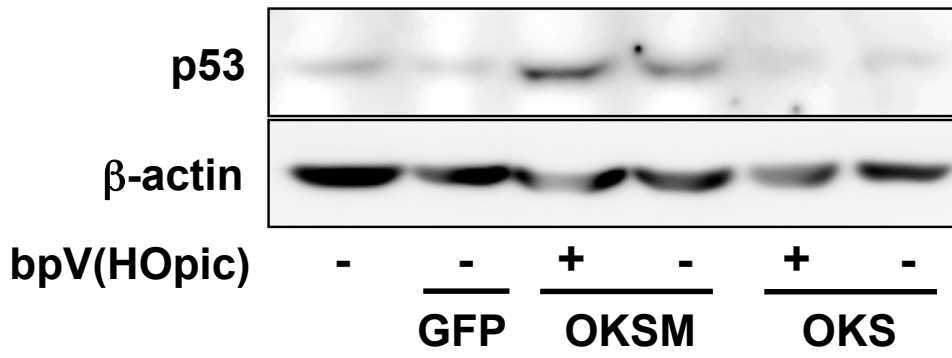

# Supplementary Tables

**Table S1 Summary of established bpV-iPSC cell lines**

| Mouse iPSC | Induction factors | Cell source | AP Stain | RT-PCR | Teratoma Formation | Karyotype analysis | Blastocyst Injectionion | Number of Chimeras |
|------------|-------------------|-------------|----------|--------|--------------------|--------------------|-------------------------|--------------------|
| bpV-iPSC-1 | OKSM              | ICR MEF     | √        | √      | ND                 | ND                 | ND                      | ND                 |
| bpV-iPSC-2 | OKSM              | ICR MEF     | √        | √      | √                  | ND                 | √                       | 0                  |
| bpV-iPSC-3 | OKSM              | ICR MEF     | √        | √      | ND                 | ND                 | ND                      | ND                 |
| bpV-iPSC-4 | OKSM              | ICR MEF     | √        | √      | ND                 | ND                 | ND                      | ND                 |
| bpV-iPSC-5 | OKSM              | ICR MEF     | √        | √      | ND                 | ND                 | ND                      | ND                 |
| bpV-iPSC-6 | OKSM              | ICR MEF     | √        | √      | √                  | 40, XY             | √                       | 8                  |
| bpV-iPSC-7 | OKSM              | ICR MEF     | √        | √      | √                  | 40, XX             | √                       | 0                  |
| bpV-iPSC-8 | OKSM              | ICR MEF     | √        | √      | √                  | 40, XY             | √                       | 1                  |

ND means not determined.

**Table S2 Primers used for RT-PCR**

| <b>Gene</b>                     | <b>Forward primer (5' to 3')</b> | <b>Reverse primer (5' to 3')</b> |
|---------------------------------|----------------------------------|----------------------------------|
| <b>pMXs</b>                     | GCCGGATCTAGCTAGTTAA              | /                                |
| <b>ERas</b>                     | ACTGCCCCTCATCAGACTGCTACT         | CACTGCCTTGTACTCGGGTAGCTG         |
| <b>Fgf4</b>                     | CGTGGTGAGCATCTTCGGAGTGG          | CCTTCTTGGTCCGCCCGTTCTTA          |
| <b>Cript</b>                    | TCACTCCAGACACATGGAAAGA           | CCATATGGATCAAACCTTGCTT           |
| <b>Dax1</b>                     | TGCTGCGGTCCAGGCCATCAAGAG         | GGGCACTGTTTCAGTTCAGCGGATC        |
| <b>Zfp296</b>                   | CCATTAGGGGCCATCATCGCTTTC         | CACTGCTCACTGGAGGGGGCTTGC         |
| <b><math>\beta</math>-actin</b> | ATGGATGACGATATCGCTGC             | TGCGCTCAGGAGGAGCAATG             |
| <b>Nanog</b>                    | AAGGCAGCCCTGATTCTTCT             | GTGCTGAGCCCTTCTGAATC             |
| <b>c-Myc</b>                    | GACTCCGTACAGCCCTATT              | TTGGCAGCTGGATAGTCCTTCCTT         |
| <b>Sox2</b>                     | ATGATGGAGACGGAGCTGA              | GTGGGAGGAAGAGGTAACCA             |
| <b>Oct3/4</b>                   | GATCCTCGAACCTGGCTAAG             | CGCCGGTTACAGAACCATAC             |
| <b>Klf4</b>                     | GCTCTGCTCCCGTCCTCCTC             | GGCATGAGCTCTTGATAATGG            |

**Table S3 Endogenous primers used for RT-PCR**

| <b>Endo-Gene</b> | <b>Forward primer (5' to 3')</b> | <b>Reverse primer (5' to 3')</b> |
|------------------|----------------------------------|----------------------------------|
| <b>c-Myc</b>     | TGAAGAAGAGCAAGAAGATGAGG          | CTTTGAGCATGCATTTTAATTCC          |
| <b>Sox2</b>      | GTGGTTACCTCTTCCTCCCACT           | CTTTGAAAATCTCTCCCCTTCTC          |
| <b>Oct3/4</b>    | TCTACTCAGTCCCTTTTCCTGAG          | AACAGCATCACTGAGCTTCTTTC          |
| <b>Klf4</b>      | CCTTACACATGAAGAGGCACTTT          | CTGATTATCCATTACAAGCTGA           |

**Table S4 Primers used for bisulfite sequencing**

| <b>Gene</b>             | <b>Forward primer (5' to 3')</b>                                | <b>Reverse primer (5' to 3')</b>    |
|-------------------------|-----------------------------------------------------------------|-------------------------------------|
| <b>Oct3/4 promoter</b>  | F1: GTTGTTTTGTTTTGGTTTTGGATAT<br>F2: ATGGGTTGAAATATTGGGTTTATTTA | CCACCCTCTAACCTTAACCTCTAAC           |
| <b>Nanog promoter 1</b> | GTTATTTAAGGTAATAGAGAAAAATTTG<br>TT                              | ACAAAAAAAAACTATAAAATAACCCAAAC<br>TA |
| <b>Nanog promoter 2</b> | F1: GAGGATGTTTTTTAAGTTTTTTTT<br>F2: AATGTTTATGGTGGATTTTGTAGGT   | CCCACACTCATATCAATATAATAAC           |

## **Supplemental Materials and Methods**

### **Chemical compounds**

Compounds used for reprogramming (day 5–14 post-transduction of OKSM) were PFT $\alpha$  (20  $\mu$ M; MBL, Woburn, MA), PD0325901 (1  $\mu$ M; Wako), CHIR99021 (3  $\mu$ M; Cayman Chemical Company, Ann Arbor, MI), Vc (50  $\mu$ g/ml; Sigma) and VPA (1 mM; Sigma) with or without bpV(HOpic) (100 nM; Calbiochem).

### **Western blot analysis**

MEFs transduced with OKSM or OKS on days 4 post-transduction were lysed in NP-40 lysis buffer (50 mM Tris-HCl, pH 7.4, 150 mM NaCl, 1 mM EDTA and 0.5% NP-40) with a protease inhibitor (Nacalai Tesque) and a Phosphatase inhibitor cocktail (Roche Diagnostics). The cell lysates were resolved by SDS-PAGE, and then transferred to a PVDF membrane. The membrane was blocked in PBS containing 0.1% Tween20 and 5% skim milk powder for 1 hr, and then incubated with antibodies against p53 (Novocastra, Newcastle, UK),  $\beta$ -actin (Santa Cruz Biotechnology) or phospho-Akt (Ser473) (Cell Signaling Technology, Boston, MA). After incubation with secondary antibodies for 1 hr, specific protein bands were detected by chemiluminescence on a LAS-3000 luminescent image analyzer (FUJIFILM, Tokyo, Japan).
